# Supplementary material for: Achieving high microscale photoconductivity in Gd-modified bismuth ferrite via modulating ferroelectric polarization
Source: Royal Society of Chemistry journal article supplement (doi:10.1039/d4tc01066c), 2024-01-01
Supplement: d4tc01066c1.pdf [file d4tc01066c1.pdf]

### Supplementary Information

**Table S1** Electrical resistance between Pt 1 and Pt 2 before and after poling under various illumination intensities.

| <b>Illumination intensity</b>     | <b>Resistance before poling</b> | <b>Resistance after poling</b> |
|-----------------------------------|---------------------------------|--------------------------------|
| <b>0 mW/cm<sup>2</sup> (dark)</b> | 3.1 <i>MΩ</i>                   | 2.7 <i>MΩ</i>                  |
| <b>200 mW/cm<sup>2</sup></b>      | 2.7 <i>MΩ</i>                   | 2.2 <i>MΩ</i>                  |
| <b>400 mW/cm<sup>2</sup></b>      | 2.5 <i>MΩ</i>                   | 2.0 <i>MΩ</i>                  |
| <b>600 mW/cm<sup>2</sup></b>      | 2.3 <i>MΩ</i>                   | 1.8 <i>MΩ</i>                  |
| <b>800 mW/cm<sup>2</sup></b>      | 2.1 <i>MΩ</i>                   | 1.6 <i>MΩ</i>                  |

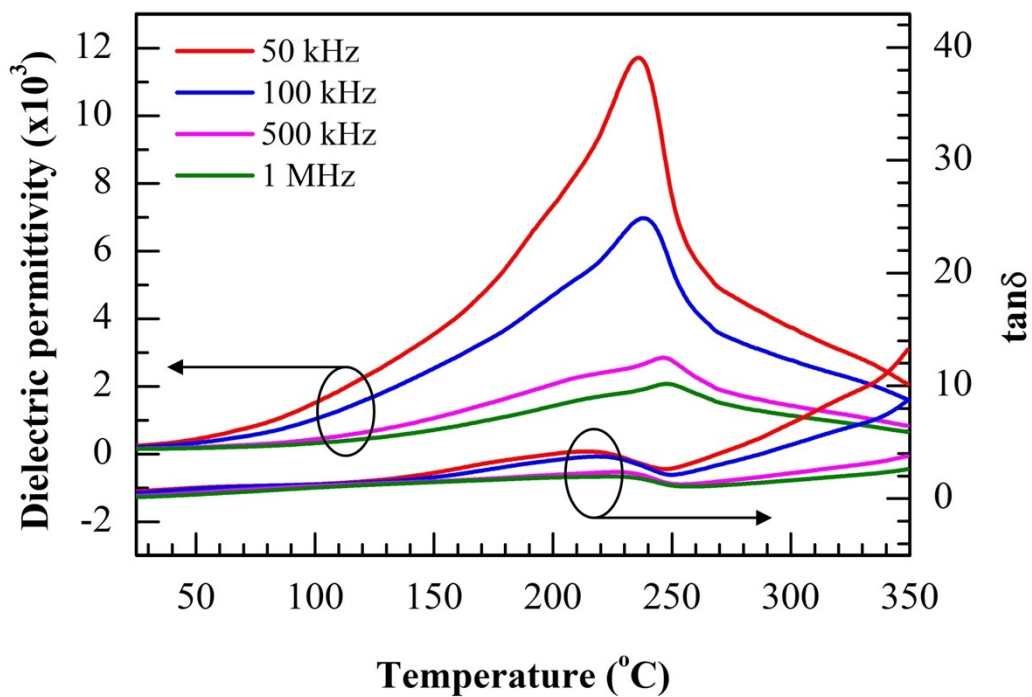

**Figure S1** Curves of the dielectric permittivity and dielectric loss ( $\tan\delta$ ) as functions of temperature.

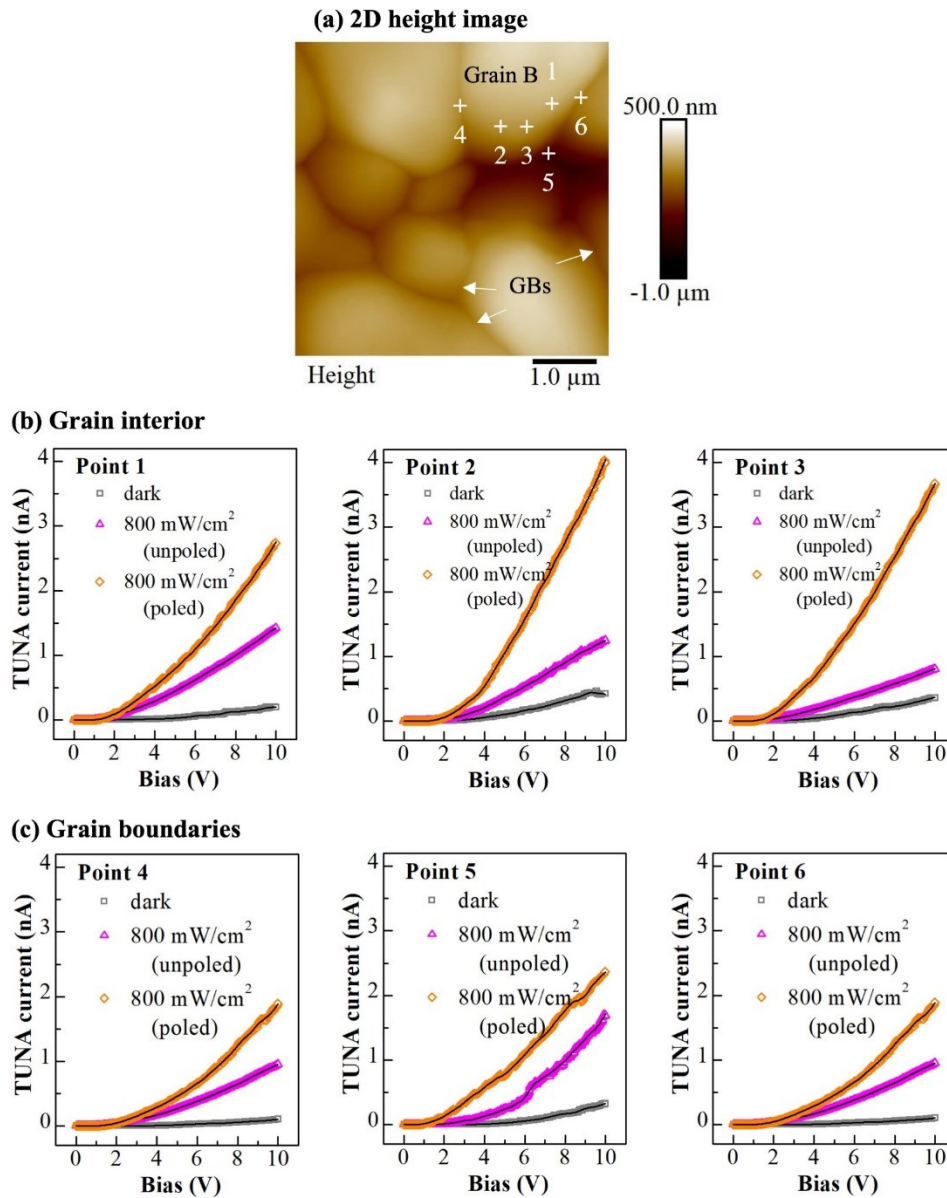

**Figure S2** Curves of the photocurrent vs. bias voltage acquired at various points in the grain interior and GBs of grain B at dark and 800-mW/cm<sup>2</sup> illumination before and after *E*-field poling.

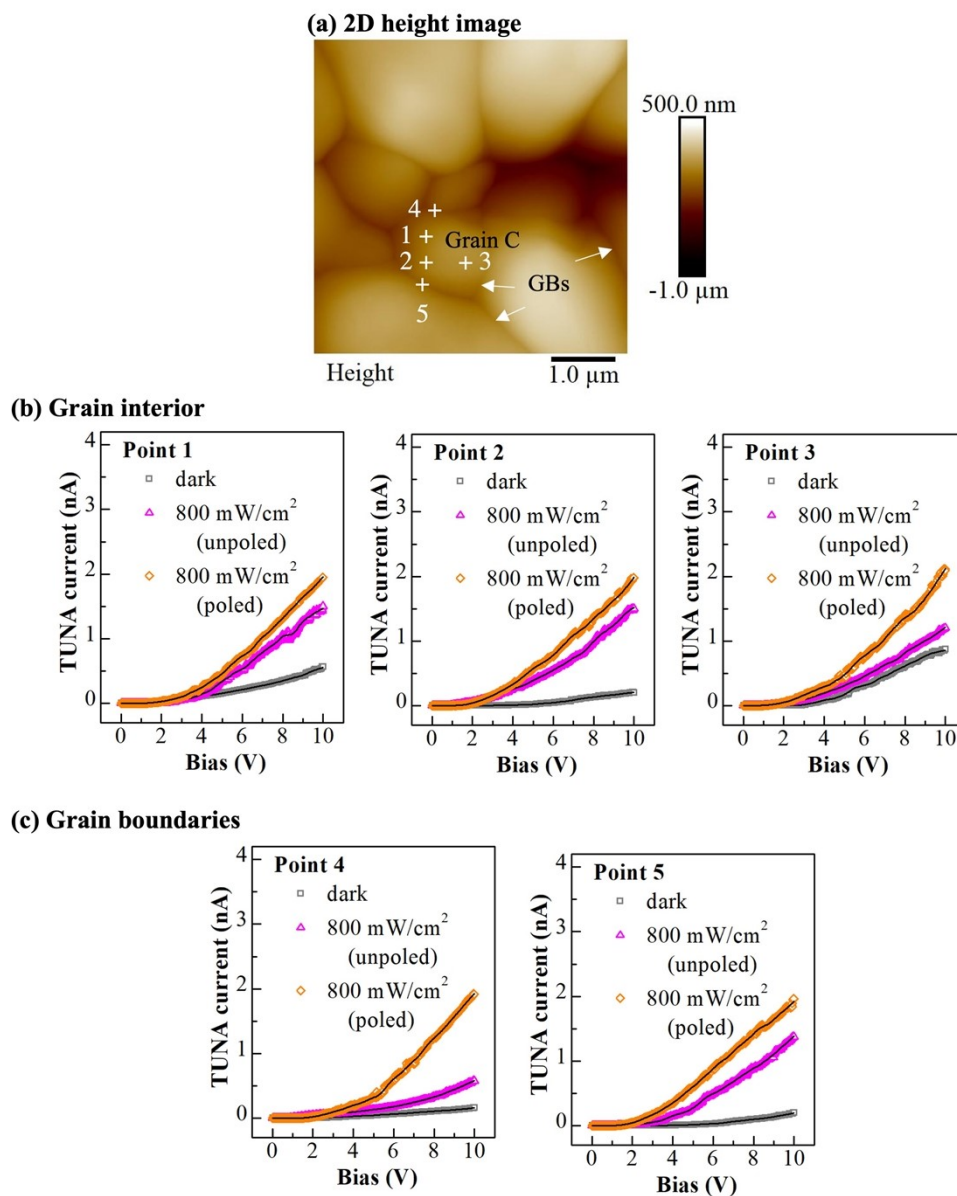

**Figure S3** Curves of the photocurrent vs. bias voltage acquired at various points in the grain interior and GBs of grain C at dark and 800-mW/cm<sup>2</sup> illumination before and after *E*-field poling.

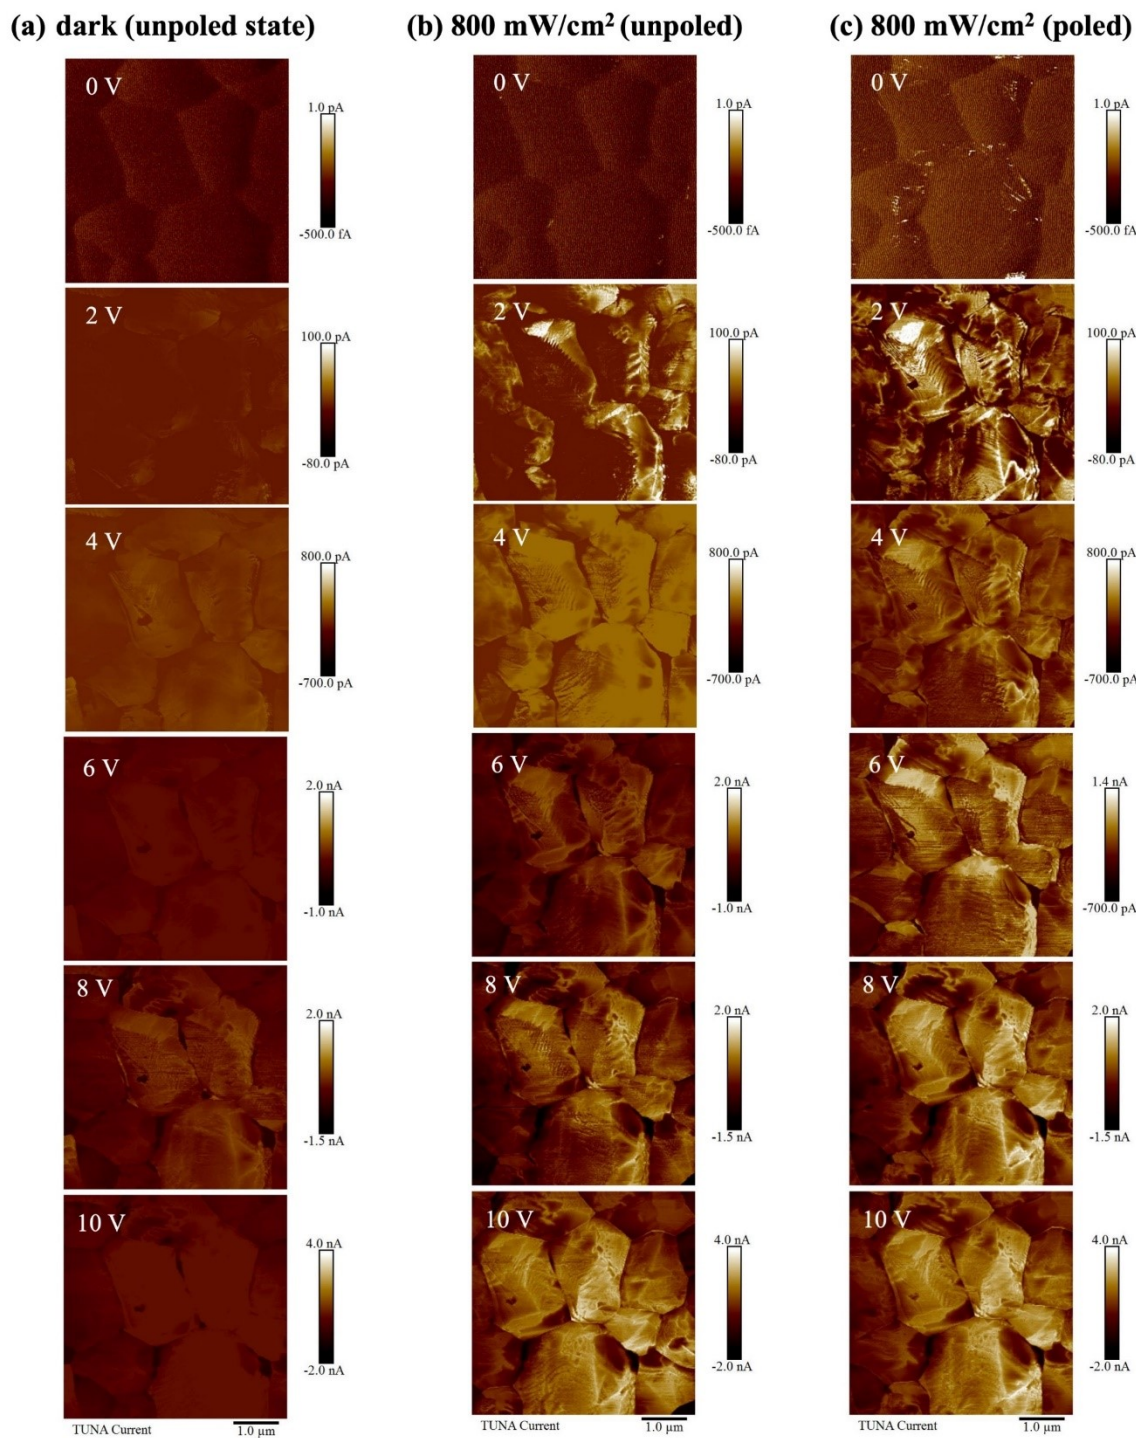

**Figure S4** Mapping of photocurrent-voltage characteristics before poling at (a) dark and (b) 800-mW/cm<sup>2</sup> illumination and after poling (c) 800-mW/cm<sup>2</sup> illumination.

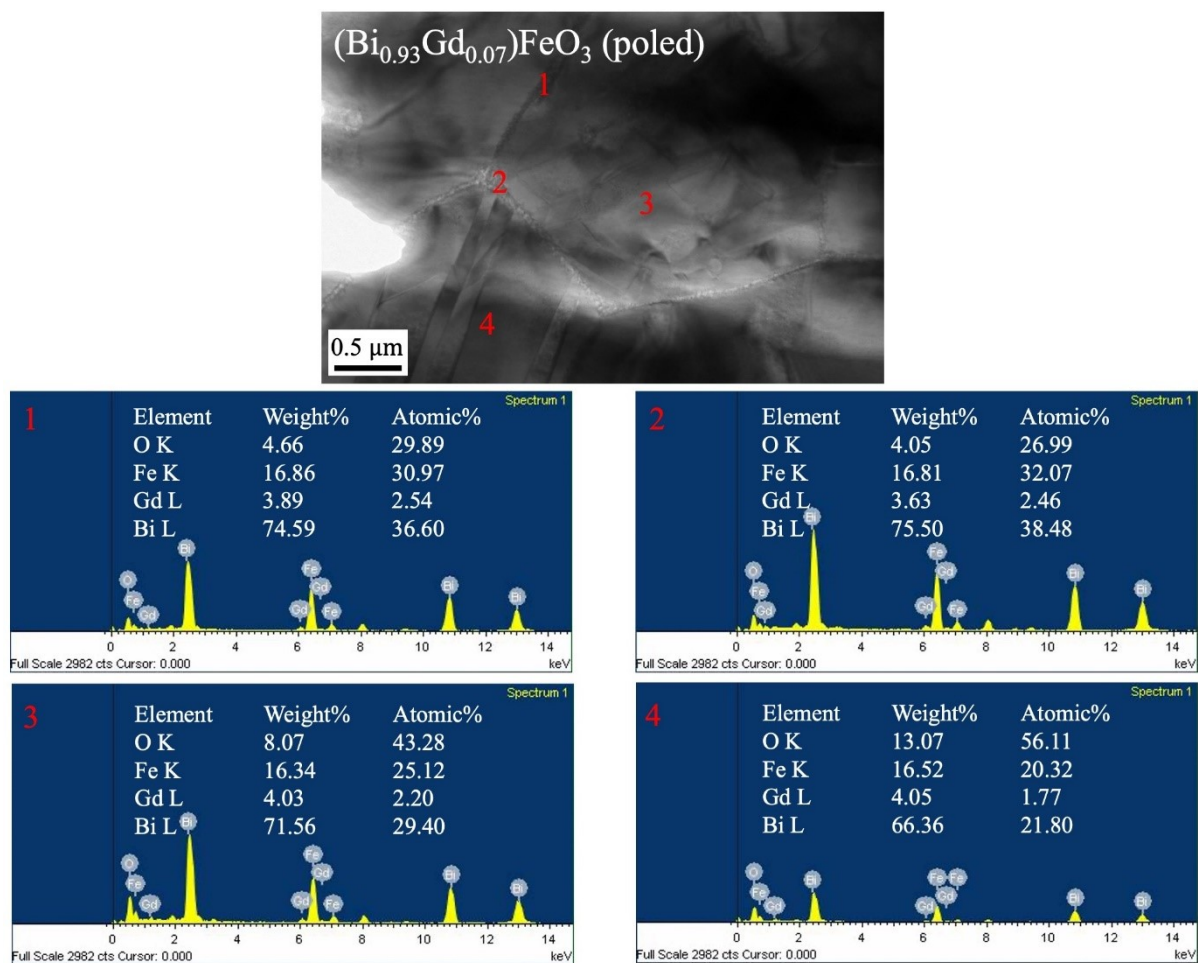

**Figure S5** TEM bright-field image of poled  $(\text{Bi}_{0.93}\text{Gd}_{0.07})\text{FeO}_3$  ceramic and the corresponding EDS spectra acquired from various points on the grain matrix.
